# Supplementary material
Source: publisher site journal article supplement (https://www.dovepress.com/article/601666)
Supplement: Supplementary file 1 [file 601666%20Supplementary%20Material%201.docx]

**1. PubMed**

Database: PubMed (including MeSH)

Search #1: ("Police"[MeSH] OR "Police"[All Fields] OR "Law Enforcement"[All Fields] OR "Police Officers"[All Fields] OR "Police Officer"[All Fields] OR "Police Personnel"[All Fields] OR "Law Enforcement Personnel"[All Fields] OR "Law Enforcement Officer"[All Fields] OR "Police Department"[All Fields] OR "Law Enforcement Agency"[All Fields])
Results: 46,939

Search #2: ("stress, psychological"[MeSH] OR "Work Stress"[All Fields] OR "Occupational Stress"[All Fields] OR "Job Stress"[All Fields] OR "Psychological Stress"[All Fields] OR "Stress"[All Fields] OR "Workload"[All Fields] OR "Job Demands"[All Fields])
Results: 1,497,874

Search #3: ("sleep depriv*"[All Fields] OR "Insomnia"[All Fields] OR "sleep disturbance*"[All Fields] OR "Sleep Problems"[All Fields] OR "Sleep Quality"[All Fields])
Results: 106,953

Search #4: #1 AND #2 AND #3
Results: 123

Limits: None

**2. Cochrane Library**

Database: Cochrane Library

Search #1: ((Police OR "Law Enforcement" OR "Police Officer" OR "Police Personnel" OR "Law Enforcement Officer")): ti,ab,kw (Word variations have been searched)
Results: 1,115

Search #2: (Stress OR "Work Stress" OR "Occupational Stress" OR "Job Stress")
Results: 96,134

Search #3: (Sleep* OR Insomnia OR "Sleep Disorder" OR "Sleep Deprivation")
Results: 77,052

Search #4: #1 AND #2 AND #3
Results: 33

Limits: Word variations searched

**3. Web of Science**

Database: Web of Science (All Databases)

Search #1: TS= (("Police" OR "Law Enforcement" OR "Police Officer" OR "Police Personnel" OR "Law Enforcement Officer"))
Results: 280,301

Search #2: TS= ("Stress" OR "Work Stress" OR "Occupational Stress" OR "Job Stress")
Results: 5,114,114

Search #3: TS= ("Sleep" OR "Insomnia" OR "Sleep Disorder" OR "Sleep Disturbance")
Results: 809,741

Search #4: #1 AND #2 AND #3
Results: 481

Limits: None

**4. SpringerLink**

Database: SpringerLink ([https://link.springer.com](https://link.springer.com/))

Search strategy (single combined search): (("police" OR "policeman" OR "law enforcement" OR "correctional officer") AND ("occupational stress" OR "work stress" OR "burnout" OR "organizational stress" OR "operational stress" OR "trauma exposure" OR "shift work" OR "night shift" OR "rotating shift") AND ("sleep disorder" OR "sleep disturbance" OR "sleep quality" OR "insomnia" OR "excessive daytime sleepiness" OR "obstructive sleep apnea" OR "shift work disorder"))
Search fields: All fields (title, abstract, keywords, full text)
Limits: Peer-reviewed only; Document type: Article; No language restriction; Publication date: from database inception to January 2026
Results: 1125

Note: SpringerLink does not provide step-by-step search history with numbered sets; the search was executed as a single combined string.
